# Supplementary material
Source: PubMed Central journal article supplement (PMC4436572)
Supplement: supp_jeb.118224_JEB118224supp.pdf [file supp_jeb.118224_JEB118224supp.pdf]

Table S1. Proteins Identified using LC-MS in adult zebrafish ventricle and atria, and in ZFHA.

|                                                         | Identified Proteins                      | Molecular Weight [kDa] | Numbers of matched peptides |       |      |
|---------------------------------------------------------|------------------------------------------|------------------------|-----------------------------|-------|------|
|                                                         |                                          |                        | Ventricle                   | Atria | ZFHA |
| heart cell specific proteins                            | Ventricular myosin heavy chain-like      | 223                    | 59                          | 24    | 14   |
|                                                         | Myosin heavy chain 6                     | 223                    | 5                           | 32    | 7    |
|                                                         | ATP synthase subunit alpha               | 60                     | 10                          | 11    | 5    |
|                                                         | Desma                                    | 56                     | 16                          | 10    | 6    |
|                                                         | Tropomyosin 4a                           | 33                     | 11                          | 9     | 3    |
|                                                         | Phosphorylase glycogen (muscle) b        | 97                     | 3                           | 4     | 2    |
|                                                         | Elongation factor 1-alpha                | 50                     | 2                           | 0     | 4    |
|                                                         | Uncharacterised protein                  | 30                     | 3                           | 3     | 2    |
|                                                         | Acyl-CoA hydrogenase very long chain     | 71                     | 3                           | 0     | 2    |
|                                                         | Parvalbumin-2                            | 12                     | 0                           | 2     | 2    |
|                                                         | Elongation factor 1-alpha                | 50                     | 2                           | 3     | 5    |
|                                                         | Parvalbumin-2                            | 12                     | 0                           | 3     | 2    |
| Striated muscle preferentially expressed protein kinase | 334                                      | 0                      | 6                           | 3     |      |
| Tropomyosin alpha-1 chain                               | 33                                       | 5                      | 7                           | 2     |      |
| heart and other cell type specific proteins             | Keratin, type II cytoskeletal 8          | 58                     | 5                           | 7     | 5    |
|                                                         | Glyceraldehyde-3-phosphate dehydrogenase | 36                     | 3                           | 0     | 2    |
|                                                         | Histone H4                               | 11                     | 3                           | 3     | 2    |
|                                                         | Vitellogenin 7                           | 149                    | 3                           | 2     | 2    |
|                                                         | Heat shock 60kD protein 1 (Chaperonin)   | 61                     | 3                           | 2     | 2    |
|                                                         | L-lactate dehydrogenase B-A chain        | 36                     | 0                           | 5     | 2    |
|                                                         | Keratin, type I cytoskeletal 18          | 52                     | 0                           | 2     | 4    |
|                                                         | Lamin B2                                 | 66                     | 3                           | 0     | 2    |
|                                                         | Zgc:55461                                | 50                     | 2                           | 0     | 2    |
|                                                         | Heat shock protein HSP 90-beta           | 82                     | 2                           | 0     | 3    |
|                                                         | Glyceraldehyde-3-phosphate dehydrogenase | 36                     | 3                           | 4     | 2    |
|                                                         | L-lactate dehydrogenase B-A chain        | 36                     | 5                           | 6     | 2    |
|                                                         | Heat shock protein HSP 90-beta           | 83                     | 2                           | 0     | 4    |
|                                                         | Actin, cytoplasmic 2                     | 42                     | 9                           | 5     | 5    |
|                                                         | Histone H3.2                             | 15                     | 4                           | 4     | 4    |
| Histone H2B 1/2                                         | 14                                       | 2                      | 3                           | 4     |      |
| 40S ribosomal protein S18                               | 18                                       | 2                      | 5                           | 2     |      |
| Heat shock cognate 71 kDa                               | 71                                       | 0                      | 2                           | 5     |      |
| Mitochondria specific proteins                          | Malate dehydrogenase                     | 35                     | 4                           | 4     | 2    |
|                                                         | Voltage-dependent anion channel 2        | 30                     | 2                           | 0     | 2    |
|                                                         | ATP5d                                    | 17                     | 2                           | 0     | 2    |
| others                                                  | Actin alpha 1a                           | 42                     | 9                           | 6     | 5    |
|                                                         | Hemoglobin subunit beta-1                | 16                     | 4                           | 5     | 3    |
|                                                         | Slow myosin heavy chain 1                | 223                    | 2                           | 0     | 2    |
|                                                         | Apolipoprotein Bb                        | 413                    | 2                           | 6     | 3    |
|                                                         | Peroxiredoxin 2                          | 22                     | 2                           | 2     | 2    |
|                                                         | Peptidyl-prolyl cis-trans isomerase      | 17                     | 3                           | 0     | 2    |
|                                                         | Hemoglobin subunit beta-1                | 16                     | 4                           | 7     | 3    |
|                                                         | Kinesin-like protein KIF22               | 71                     | 2                           | 0     | 2    |
|                                                         | 14-3-3 protein beta/alpha-A              | 28                     | 2                           | 2     | 2    |

Data are from pooled samples of n= 6 adult ventricle, n=5 adult atria and n=20 ZFHAs after 3 days in culture. The number of matched peptides shows how many peptides were used to identify the protein in the sample. The greater the number of matches the more certain the identification. 1 match is a possible identification, 2 – 3 matches a probable identification, 4 and over almost certain identification. There were 44 peptides with 2 or more matches and these were identified against both Swissprot and DANRE databases (see methods for details).
